# Supplementary material for: Severe Pediatric COVID-19 and Multisystem Inflammatory Syndrome in Children From Wild-type to Population Immunity: A Prospective Multicenter Cohort Study With Real-time Reporting
Source: PubMed Central journal article supplement — Pediatr Infect Dis J. 2023 Oct 12;42(12):1077–85. doi: 10.1097/INF.0000000000004098 (PMC10629607; doi:10.1097/inf.0000000000004098), 2023-10-12
Supplement: inf-42-1077-s002.pdf [file inf-42-1077-s002.pdf]

## Supplemental Digital Content 2. Table: STROBE Checklist

STROBE Statement—Checklist of items that should be included in reports of *cohort studies*

|                              | Item No | Recommendation                                                                                                                                                                                    | Location in manuscript                                                                                            |
|------------------------------|---------|---------------------------------------------------------------------------------------------------------------------------------------------------------------------------------------------------|-------------------------------------------------------------------------------------------------------------------|
| Title and abstract           | 1       | (a) Indicate the study's design with a commonly used term in the title or the abstract                                                                                                            | Title states design of study                                                                                      |
|                              |         | (b) Provide in the abstract an informative and balanced summary of what was done and what was found                                                                                               | Abstract                                                                                                          |
| <b>Introduction</b>          |         |                                                                                                                                                                                                   |                                                                                                                   |
| Background/rationale         | 2       | Explain the scientific background and rationale for the investigation being reported                                                                                                              | Introduction, paragraph 1-2                                                                                       |
| Objectives                   | 3       | State specific objectives, including any prespecified hypotheses                                                                                                                                  | Introduction, final paragraph                                                                                     |
| <b>Methods</b>               |         |                                                                                                                                                                                                   |                                                                                                                   |
| Study design                 | 4       | Present key elements of study design early in the paper                                                                                                                                           | Materials and Methods, paragraph Study Design, Setting, and Participants                                          |
| Setting                      | 5       | Describe the setting, locations, and relevant dates, including periods of recruitment, exposure, follow-up, and data collection                                                                   | Materials and Methods, paragraph Study Design, Setting, and Participants                                          |
| Participants                 | 6       | (a) Give the eligibility criteria, and the sources and methods of selection of participants. Describe methods of follow-up                                                                        | Materials and Methods, paragraph Study Design, Setting, and Participants                                          |
|                              |         | (b) For matched studies, give matching criteria and number of exposed and unexposed                                                                                                               | Not applicable                                                                                                    |
| Variables                    | 7       | Clearly define all outcomes, exposures, predictors, potential confounders, and effect modifiers. Give diagnostic criteria, if applicable                                                          | Materials and Methods, Data collection, Outcomes, and SARS-CoV-2 variants and population immunity paragraphs      |
| Data sources/<br>measurement | 8*      | For each variable of interest, give sources of data and details of methods of assessment (measurement). Describe comparability of assessment methods if there is more than one group              | Materials and Methods, Data collection, Outcomes, and SARS-CoV-2 variants and population immunity paragraphs      |
| Bias                         | 9       | Describe any efforts to address potential sources of bias                                                                                                                                         | Materials and Methods, SARS-CoV-2 variants and population immunity, and Statistical Analysis paragraphs           |
| Study size                   | 10      | Explain how the study size was arrived at                                                                                                                                                         | Supplemental Digital Content 4                                                                                    |
| Quantitative variables       | 11      | Explain how quantitative variables were handled in the analyses. If applicable, describe which groupings were chosen and why                                                                      | Materials and Methods, Outcomes, SARS-CoV-2 variants and population immunity, and Statistical Analysis paragraphs |
| Statistical methods          | 12      | (a) Describe all statistical methods, including those used to control for confounding                                                                                                             | Materials and Methods, Statistical Analysis paragraph                                                             |
|                              |         | (b) Describe any methods used to examine subgroups and interactions                                                                                                                               | Materials and Methods, Statistical Analysis paragraph                                                             |
|                              |         | (c) Explain how missing data were addressed                                                                                                                                                       | Materials and Methods, Statistical Analysis paragraph                                                             |
|                              |         | (d) If applicable, explain how loss to follow-up was addressed                                                                                                                                    | Not applicable                                                                                                    |
|                              |         | (e) Describe any sensitivity analyses                                                                                                                                                             | Materials and Methods, Statistical Analysis paragraph                                                             |
| <b>Results</b>               |         |                                                                                                                                                                                                   |                                                                                                                   |
| Participants                 | 13*     | (a) Report numbers of individuals at each stage of study—eg numbers potentially eligible, examined for eligibility, confirmed eligible, included in the study, completing follow-up, and analysed | Results, paragraph Clinical cohort characteristics                                                                |

|                          |     |                                                                                                                                                                                                              |                                                                                                                                              |
|--------------------------|-----|--------------------------------------------------------------------------------------------------------------------------------------------------------------------------------------------------------------|----------------------------------------------------------------------------------------------------------------------------------------------|
|                          |     | (b) Give reasons for non-participation at each stage                                                                                                                                                         | Results, paragraph Clinical cohort characteristics                                                                                           |
|                          |     | (c) Consider use of a flow diagram                                                                                                                                                                           | Supplemental Digital Content 4                                                                                                               |
| Descriptive data         | 14* | (a) Give characteristics of study participants (eg demographic, clinical, social) and information on exposures and potential confounders                                                                     | Results, paragraph Clinical cohort characteristics, and supplementary appendix: eTable 1                                                     |
|                          |     | (b) Indicate number of participants with missing data for each variable of interest                                                                                                                          | Supplemental Digital Content 5                                                                                                               |
|                          |     | (c) Summarise follow-up time (eg, average and total amount)                                                                                                                                                  | Not applicable                                                                                                                               |
| Outcome data             | 15* | Report numbers of outcome events or summary measures over time                                                                                                                                               | Results, Incidence rate during phases of the pandemic, and Risk factors for severe disease paragraphs                                        |
| Main results             | 16  | (a) Give unadjusted estimates and, if applicable, confounder-adjusted estimates and their precision (eg, 95% confidence interval). Make clear which confounders were adjusted for and why they were included | Results, Incidence rate during phases of the pandemic, and Risk factors for severe disease paragraphs                                        |
|                          |     | (b) Report category boundaries when continuous variables were categorized                                                                                                                                    | Results, Incidence rate during phases of the pandemic, and Risk factors for severe disease paragraphs                                        |
|                          |     | (c) If relevant, consider translating estimates of relative risk into absolute risk for a meaningful time period                                                                                             | Not relevant                                                                                                                                 |
| Other analyses           | 17  | Report other analyses done—eg analyses of subgroups and interactions, and sensitivity analyses                                                                                                               | Results, Clinical cohort characteristics, Incidence rate during phases of the pandemic and Dynamics of disease severity over time paragraphs |
| <b>Discussion</b>        |     |                                                                                                                                                                                                              |                                                                                                                                              |
| Key results              | 18  | Summarise key results with reference to study objectives                                                                                                                                                     | Discussion, paragraph 2-5                                                                                                                    |
| Limitations              | 19  | Discuss limitations of the study, taking into account sources of potential bias or imprecision. Discuss both direction and magnitude of any potential bias                                                   | Discussion, paragraph 6                                                                                                                      |
| Interpretation           | 20  | Give a cautious overall interpretation of results considering objectives, limitations, multiplicity of analyses, results from similar studies, and other relevant evidence                                   | Discussion, paragraph 7                                                                                                                      |
| Generalisability         | 21  | Discuss the generalisability (external validity) of the study results                                                                                                                                        | Discussion, paragraph 7                                                                                                                      |
| <b>Other information</b> |     |                                                                                                                                                                                                              |                                                                                                                                              |
| Funding                  | 22  | Give the source of funding and the role of the funders for the present study and, if applicable, for the original study on which the present article is based                                                | Title Page and Acknowledgments                                                                                                               |

\*Give information separately for exposed and unexposed groups.

Note: An Explanation and Elaboration article discusses each checklist item and gives methodological background and published examples of transparent reporting. The STROBE checklist is best used in conjunction with this article (freely available on the Web sites of PLoS Medicine at <http://www.plosmedicine.org/>, Annals of Internal Medicine at <http://www.annals.org/>, and Epidemiology at <http://www.epidem.com/>). Information on the STROBE Initiative is available at <http://www.strobe-statement.org>.
