# Supplementary material for: Severe Pediatric COVID-19 and Multisystem Inflammatory Syndrome in Children From Wild-type to Population Immunity: A Prospective Multicenter Cohort Study With Real-time Reporting
Source: PubMed Central journal article supplement — Pediatr Infect Dis J. 2023 Oct 12;42(12):1077–85. doi: 10.1097/INF.0000000000004098 (PMC10629607; doi:10.1097/inf.0000000000004098), 2023-10-12
Supplement: inf-42-1077-s003.pdf [file inf-42-1077-s003.pdf]

**Supplemental Digital Content 3. Figure: Study coverage based on Dutch hospital adherence regions**

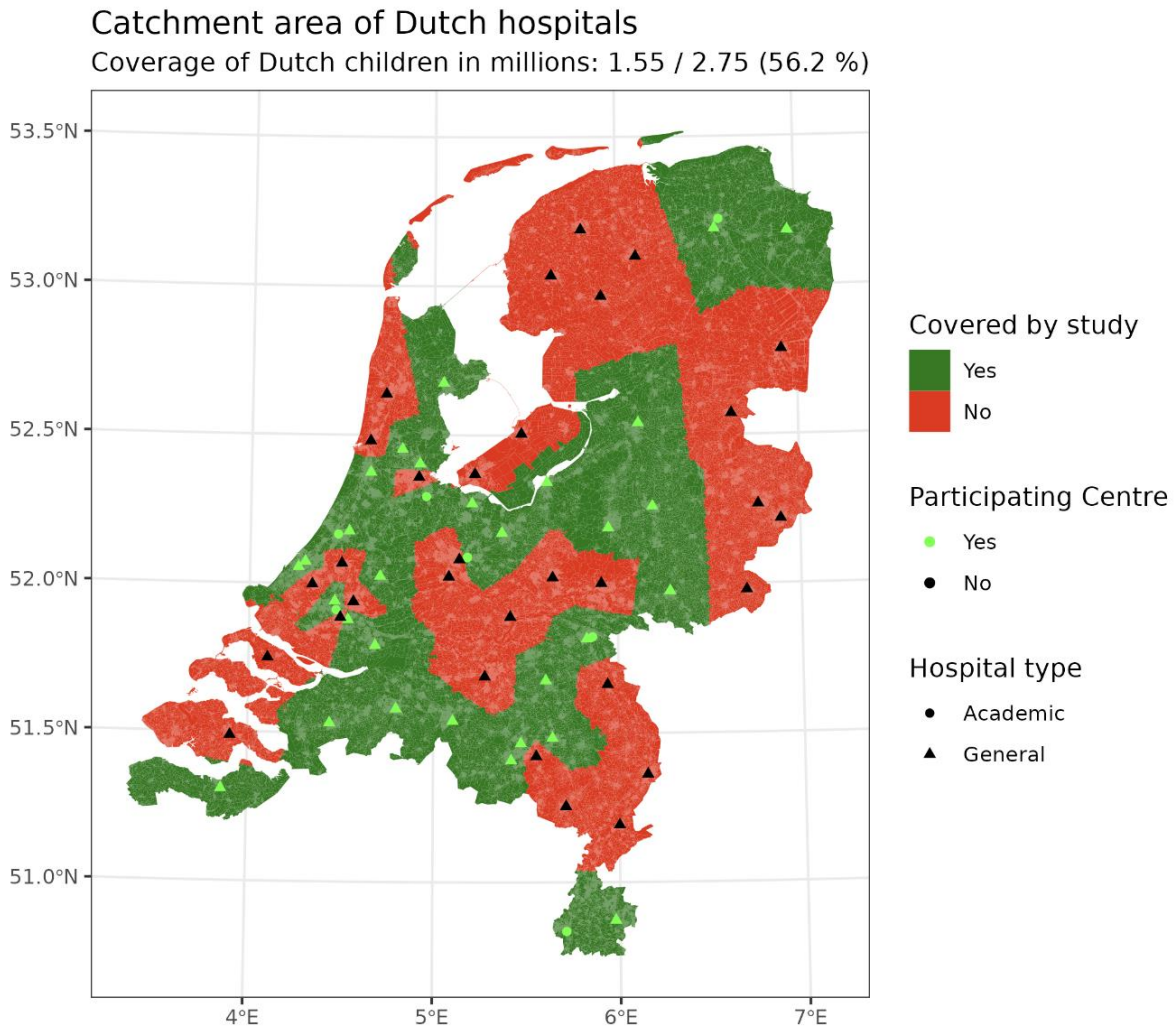

Study coverage map by hospital catchment area. Coverage was determined by calculating the nearest hospital per region based on the geometric distance between the centroid of a high resolution zip code area and all Dutch hospitals. The catchment area of participating hospitals is shown in green, and the catchment area of hospitals not participating is shown in red. The number of children per high resolution zip code were extracted from the Dutch national statistics bureau (Centraal Bureau voor de Statistiek, [www.cbs.nl](http://www.cbs.nl)). Using this method, we determined the study coverage to be 1.55/2.75 million children, or 56.2%.
