# Supplementary material for: Severe Pediatric COVID-19 and Multisystem Inflammatory Syndrome in Children From Wild-type to Population Immunity: A Prospective Multicenter Cohort Study With Real-time Reporting
Source: PubMed Central journal article supplement — Pediatr Infect Dis J. 2023 Oct 12;42(12):1077–85. doi: 10.1097/INF.0000000000004098 (PMC10629607; doi:10.1097/inf.0000000000004098), 2023-10-12
Supplement: inf-42-1077-s006.pdf [file inf-42-1077-s006.pdf]

**Supplemental Digital Content 6. Figure: Outcome of treatment of MIS-C with IVIG only or IVIG plus systemic steroids**

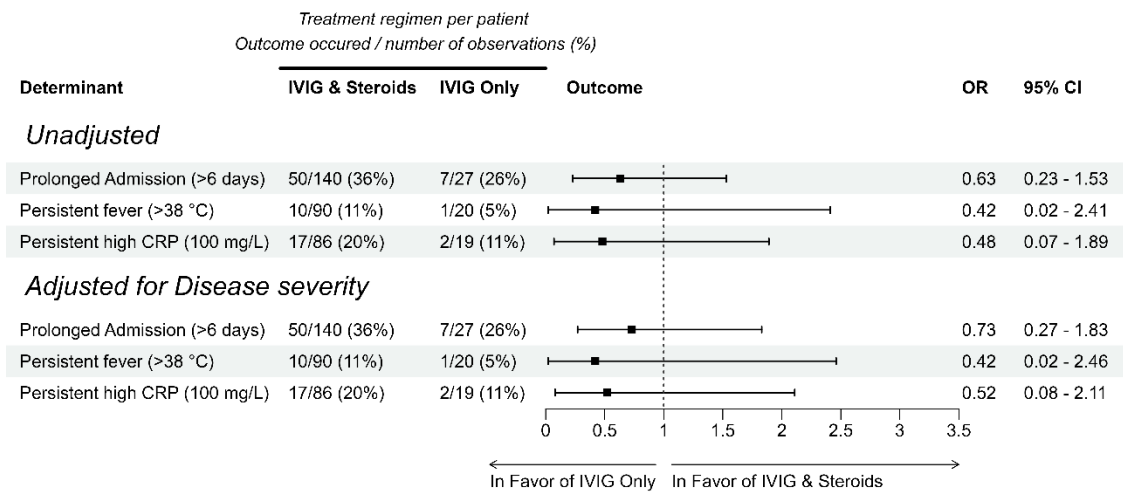

Outcomes measures of different treatment modalities based on unadjusted and adjusted logistic regression (IVIG versus IVIG & systemic corticosteroids). Outcome measures are prolonged admission (> 6 days after start treatment); persistent fever (> 38 °C) after 2 days till 7 days after treatment start; and persistent elevated CRP (>100 mg/L) after 2 days till 7 days after treatment start. Analyses were repeated with addition of disease severity to produce adjusted values. If outcome or date of start therapy (IVIG or IVIG & systemic corticosteroids), was missing the patient was excluded from analysis for that particular outcome.
