# Supplementary material for: Severe Pediatric COVID-19 and Multisystem Inflammatory Syndrome in Children From Wild-type to Population Immunity: A Prospective Multicenter Cohort Study With Real-time Reporting
Source: PubMed Central journal article supplement — Pediatr Infect Dis J. 2023 Oct 12;42(12):1077–85. doi: 10.1097/INF.0000000000004098 (PMC10629607; doi:10.1097/inf.0000000000004098), 2023-10-12
Supplement: inf-42-1077-s007.pdf [file inf-42-1077-s007.pdf]

### Supplemental Digital Content 7. Figure: Decline of C-reactive protein and body temperature in treatment of MIS-C with IVIG only or IVIG plus systemic steroids

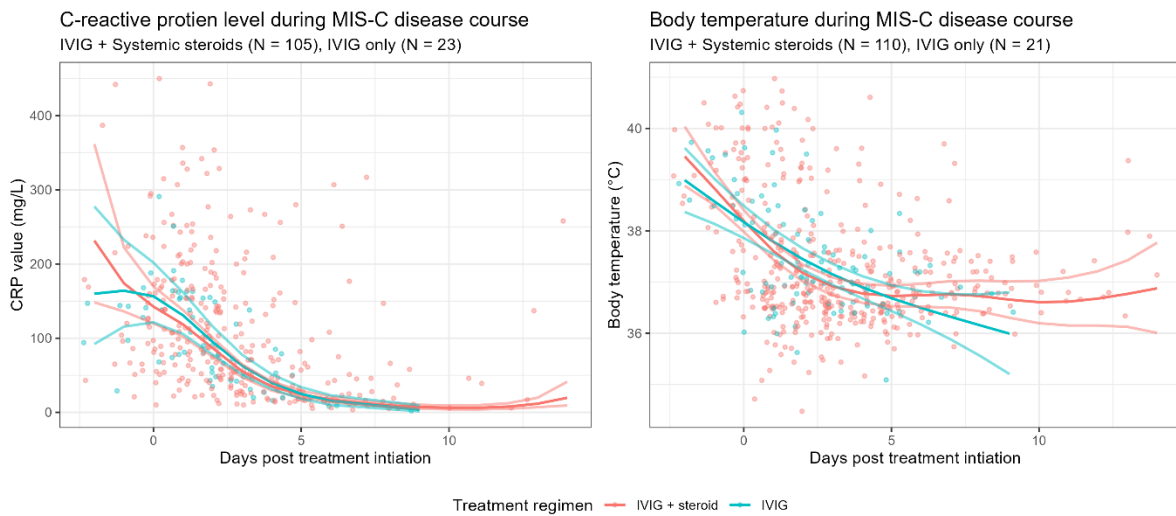

Longitudinal C-reactive protein (CRP) and temperature sampling for different MIS-C treatment regimens. A univariate generalized additive mixed model with CRP and body temperature as dependent variables and time (days after treatment start) by treatment regimen was used as independent variable. Individual patients were included as random effect. Only patients with longitudinal data of CRP level or body temperature between minus 2 and 14 days post treatment initiation were included in the analysis. For visualization purposes random jittering of points was performed.
