# Supplementary material for: Severe Pediatric COVID-19 and Multisystem Inflammatory Syndrome in Children From Wild-type to Population Immunity: A Prospective Multicenter Cohort Study With Real-time Reporting
Source: PubMed Central journal article supplement — Pediatr Infect Dis J. 2023 Oct 12;42(12):1077–85. doi: 10.1097/INF.0000000000004098 (PMC10629607; doi:10.1097/inf.0000000000004098), 2023-10-12
Supplement: inf-42-1077-s008.pdf [file inf-42-1077-s008.pdf]

**Supplemental Digital Content 8. Table: Risk factors for disease severity in pediatric COVID-19 and MIS-C: multivariate logistic regression analysis**

| Characteristic                      | Severe Disease / Count (%) | OR   | 95% CI     | p-value |
|-------------------------------------|----------------------------|------|------------|---------|
| <b>COVID-19</b>                     |                            |      |            |         |
| Age (stratified)                    |                            |      |            |         |
| < 5 years                           | 81 / 281 (29%)             | Ref  | Ref        |         |
| 5-12 years                          | 15 / 31 (48%)              | 1.17 | 0.48, 2.79 | 0.86    |
| > 12 years                          | 33 / 54 (61%)              | 3.08 | 1.58, 6.11 | 0.0054  |
| Positive medical history            |                            |      |            |         |
| No                                  | 54 / 206 (26%)             | Ref  | Ref        |         |
| Yes                                 | 74 / 160 (47%)             | 0.96 | 0.54, 1.67 | 0.92    |
| Abnormal neurocognitive development |                            |      |            |         |
| No                                  | 90 / 292 (31%)             | Ref  | Ref        |         |
| Yes                                 | 39 / 74 (53%)              | 1.82 | 0.98, 3.35 | 0.12    |
| History of pulmonary condition      |                            |      |            |         |
| No                                  | 92 / 319 (29%)             | Ref  | Ref        |         |
| Yes                                 | 37 / 47 (79%)              | 7.73 | 3.47, 18.6 | <0.0001 |
| <b>MIS-C</b>                        |                            |      |            |         |
| Age (stratified)                    |                            |      |            |         |
| 5-12 years                          | 50 / 116 (43%)             | Ref  | Ref        |         |
| < 5 years                           | 4 / 26 (15%)               | 0.26 | 0.07, 0.75 | 0.064   |
| > 12 years                          | 27 / 47 (57%)              | 2.01 | 0.98, 4.24 | 0.13    |
| SARS-CoV-2 variant phase            |                            |      |            |         |
| Wild-type                           | 37 / 76 (49%)              | Ref  | Ref        |         |
| Alpha                               | 12 / 26 (46%)              | 0.92 | 0.36, 2.34 | 0.92    |
| Delta                               | 28 / 67 (42%)              | 1.00 | 0.49, 1.74 | 1.00    |
| Omicron                             | 4 / 20 (20%)               | 0.28 | 0.07, 0.89 | 0.097   |

All variables from Figure 2 from the manuscript that were strongly and moderately associated with disease severity or protective from severe disease with a p-value < 0.1 were re-analysed using a multivariate logistic regression model. The COVID-19 and MIS-C cohort were analysed separately. Abbreviations: OR: Odds ratio, CI: Confidence interval.
