# Supplementary material for: Severe Pediatric COVID-19 and Multisystem Inflammatory Syndrome in Children From Wild-type to Population Immunity: A Prospective Multicenter Cohort Study With Real-time Reporting
Source: PubMed Central journal article supplement — Pediatr Infect Dis J. 2023 Oct 12;42(12):1077–85. doi: 10.1097/INF.0000000000004098 (PMC10629607; doi:10.1097/inf.0000000000004098), 2023-10-12
Supplement: inf-42-1077-s009.pdf [file inf-42-1077-s009.pdf]

**Supplemental Digital Content 9. Figure: Laboratory values and vital parameters at initial hospital visit**

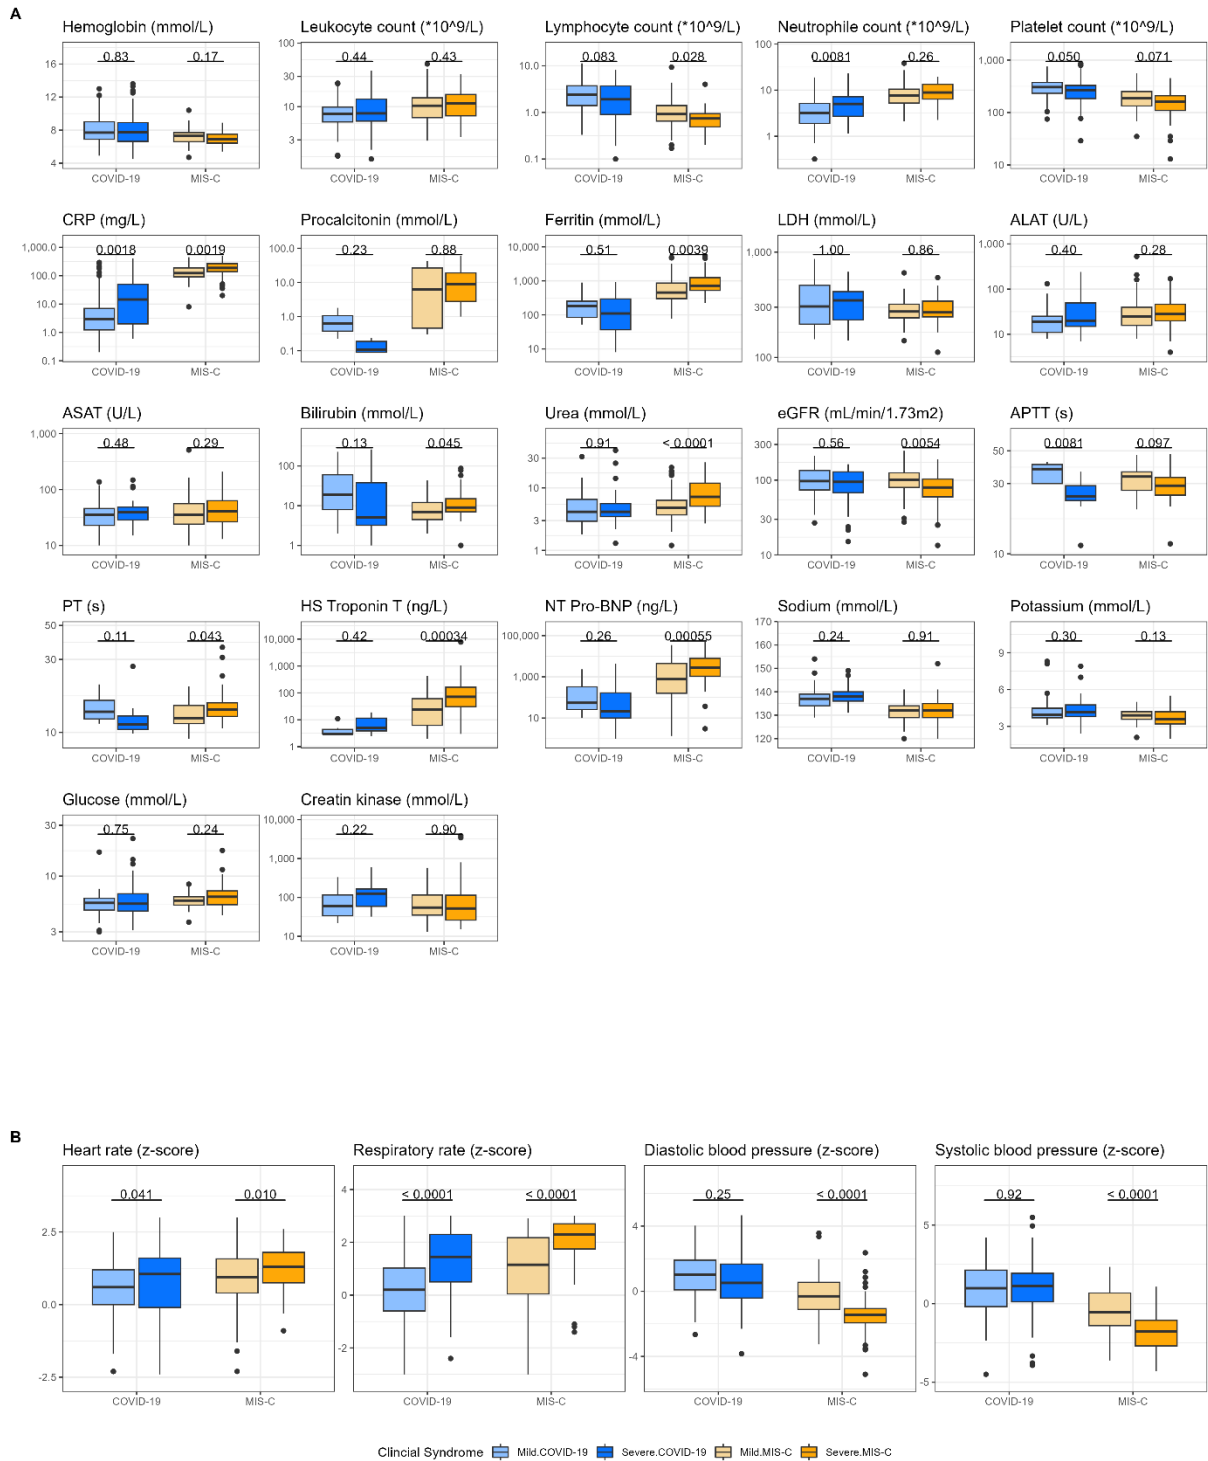

Laboratory markers and vital parameters of MIS-C and pediatric COVID-19 patients at start of hospital admission.

A: Laboratory markers, B: Vital parameters. P-values were calculated based on the Wilcoxon rank sum test. Y-

axes are log<sup>10</sup> transformed where appropriate.
