# Supplementary material for: Severe Pediatric COVID-19 and Multisystem Inflammatory Syndrome in Children From Wild-type to Population Immunity: A Prospective Multicenter Cohort Study With Real-time Reporting
Source: PubMed Central journal article supplement — Pediatr Infect Dis J. 2023 Oct 12;42(12):1077–85. doi: 10.1097/INF.0000000000004098 (PMC10629607; doi:10.1097/inf.0000000000004098), 2023-10-12
Supplement: inf-42-1077-s010.pdf [file inf-42-1077-s010.pdf]

**Supplemental Digital Content 10. Table: Risk factors for disease severity in patients with MIS-C: univariate logistic regression analysis**

| Characteristic                          | Severe Disease / Count (%) | OR   | 95% CI     | p-value |
|-----------------------------------------|----------------------------|------|------------|---------|
| PCR/antigen positive at start admission |                            |      |            |         |
| No                                      | 66 / 146 (45%)             | Ref  | Ref        |         |
| Yes                                     | 13 / 39 (33%)              | 0.61 | 0.28, 1.25 | 0.30    |
| <b>Organ involvement</b>                |                            |      |            |         |
| Pulmonary involvement                   |                            |      |            |         |
| No                                      | 63 / 154 (41%)             | Ref  | Ref        |         |
| Yes                                     | 18 / 35 (51%)              | 1.53 | 0.73, 3.22 | 0.40    |
| Gastro-intestinal involvement           |                            |      |            |         |
| No                                      | 4 / 15 (27%)               | Ref  | Ref        |         |
| Yes                                     | 77 / 171 (45%)             | 2.25 | 0.74, 8.38 | 0.30    |
| Renal involvement                       |                            |      |            |         |
| No                                      | 44 / 120 (37%)             | Ref  | Ref        |         |
| Yes                                     | 22 / 33 (67%)              | 3.45 | 1.56, 8.04 | 0.011   |
| Hematological involvement               |                            |      |            |         |
| No                                      | 14 / 35 (40%)              | Ref  | Ref        |         |
| Yes                                     | 61 / 131 (47%)             | 1.31 | 0.62, 2.84 | 0.64    |
| Neurological involvement                |                            |      |            |         |
| No                                      | 51 / 119 (43%)             | Ref  | Ref        |         |
| Yes                                     | 30 / 65 (46%)              | 1.14 | 0.62, 2.10 | 0.81    |
| Cardiac involvement                     |                            |      |            |         |
| No                                      | 7 / 36 (19%)               | Ref  | Ref        |         |
| Yes                                     | 73 / 142 (51%)             | 4.38 | 1.89, 11.5 | 0.0054  |

The effects of SARS-CoV-2 and MIS-C related clinical characteristics on disease severity in a univariate logistic regression model. Data on SARS-CoV-2 PCR/antigen status were collected at start of admission. Organ involvement was classified based on the criteria set by the CDC. Abbreviations: OR: Odds ratio, CI: Confidence interval.
