# Supplementary material for: Severe Pediatric COVID-19 and Multisystem Inflammatory Syndrome in Children From Wild-type to Population Immunity: A Prospective Multicenter Cohort Study With Real-time Reporting
Source: PubMed Central journal article supplement — Pediatr Infect Dis J. 2023 Oct 12;42(12):1077–85. doi: 10.1097/INF.0000000000004098 (PMC10629607; doi:10.1097/inf.0000000000004098), 2023-10-12
Supplement: inf-42-1077-s013.pdf [file inf-42-1077-s013.pdf]

**Supplemental Digital Content 13. Table: Clinical and demographic characteristics of MIS-C patients per SARS-CoV-2 variant phase**

| Characteristic                      | Individual phases |                  |                 |                  |                            | Omicron/Population Immunity versus other phases |                                     |         |
|-------------------------------------|-------------------|------------------|-----------------|------------------|----------------------------|-------------------------------------------------|-------------------------------------|---------|
|                                     | Wild-type, N = 76 | Alpha, N = 26    | Delta, N = 67   | Omicron, N = 20  | Population Immunity, N = 0 | WT/Alpha/Delta, N = 169                         | Omicron/Population immunity, N = 20 | p-value |
| Age (continuous)                    | 10.7 (7.9, 14.0)  | 10.6 (8.4, 13.3) | 7.9 (5.8, 11.1) | 10.1 (5.2, 12.3) | No cases                   | 10.0 (6.8, 12.0)                                | 10.1 (5.2, 12.3)                    | 0.94    |
| Medical history present             | 30% (23/76)       | 31% (8/26)       | 36% (24/66)     | 40% (8/20)       | No cases                   | 33% (55/168)                                    | 40% (8/20)                          | 0.67    |
| Abnormal neurocognitive development | 2.7% (2/75)       | 0% (0/25)        | 3.1% (2/65)     | 15% (3/20)       | No cases                   | 2.4% (4/165)                                    | 15% (3/20)                          | 0.074   |
| History of pulmonary condition      | 6.7% (5/75)       | 7.7% (2/26)      | 1.5% (1/66)     | 5.0% (1/20)      | No cases                   | 4.8% (8/167)                                    | 5.0% (1/20)                         | 1.0     |
| ICU admission                       | 64% (49/76)       | 58% (15/26)      | 51% (34/67)     | 40% (8/20)       | No cases                   | 58% (98/169)                                    | 40% (8/20)                          | 0.23    |
| length of hospitalization           | 7.0 (5.0, 9.0)    | 5.0 (4.0, 6.8)   | 4.0 (3.0, 6.0)  | 4.0 (2.0, 6.0)   | No cases                   | 5.0 (4.0, 7.0)                                  | 4.0 (2.0, 6.0)                      | 0.045   |
| Severe disease                      | 49% (37/76)       | 46% (12/26)      | 42% (28/67)     | 20% (4/20)       | No cases                   | 46% (77/169)                                    | 20% (4/20)                          | 0.074   |

Clinical characteristics of patients at different SARS-CoV-2 phases. Descriptive statistics are shown for alle individual phases and inferential statistics are presented to test for differences between the pre-omicron variants (wild-type, alpha, and delta) versus omicron and population immunity phases. Continuous values are described with the median and interquartile ranges and the Wilcoxon rank sum test was used for statistical testing. For categorical values the count, numerator and percentage are shown and the Pearson's Chi-squared test, and the Fisher's exact test where appropriate, were used for statistical testing.
