# Supplementary material for: Severe Pediatric COVID-19 and Multisystem Inflammatory Syndrome in Children From Wild-type to Population Immunity: A Prospective Multicenter Cohort Study With Real-time Reporting
Source: PubMed Central journal article supplement — Pediatr Infect Dis J. 2023 Oct 12;42(12):1077–85. doi: 10.1097/INF.0000000000004098 (PMC10629607; doi:10.1097/inf.0000000000004098), 2023-10-12
Supplement: inf-42-1077-s014.pdf [file inf-42-1077-s014.pdf]

**Supplemental Digital Content 14. Table: Citations of Dutch Health Council**

| <b>Topic</b>         | <b>Title (translated)</b>                                                            | <b>Date of release</b> | <b>URL</b>           |
|----------------------|--------------------------------------------------------------------------------------|------------------------|----------------------|
| Booster vaccination  | COVID-19 vaccination of 5 to 11 year old children and use of bivalent vaccines       | 2023-01-10             | <a href="#">link</a> |
| Booster vaccination  | Application framework revaccination against COVID-19                                 | 2022-03-25             | <a href="#">link</a> |
| Booster vaccination  | Recommendation Booster vaccination of adolescents against COVID-19                   | 2022-02-09             | <a href="#">link</a> |
| Vaccination strategy | Vaccination of 5 to 11 year old's against COVID-19                                   | 2021-12-10             | <a href="#">link</a> |
| Vaccination strategy | COVID-19 vaccination of young children with increased medical risk                   | 2021-12-03             | <a href="#">link</a> |
| Vaccination strategy | Advice on vaccination of adolescents against COVID-19                                | 2021-06-29             | <a href="#">link</a> |
| Vaccination strategy | Advice on vaccination of children with a medical risk and ring vaccination committee | 2021-06-09             | <a href="#">link</a> |
