# Supplementary figures and images for: Severe Pediatric COVID-19 and Multisystem Inflammatory Syndrome in Children From Wild-type to Population Immunity: A Prospective Multicenter Cohort Study With Real-time Reporting
Source: PubMed Central journal article supplement — Pediatr Infect Dis J. 2023 Oct 12;42(12):1077–85. doi: 10.1097/INF.0000000000004098 (PMC10629607; doi:10.1097/inf.0000000000004098), 2023-10-12

Supplemental Digital Content 1. Figure: Real Time Reporting Framework

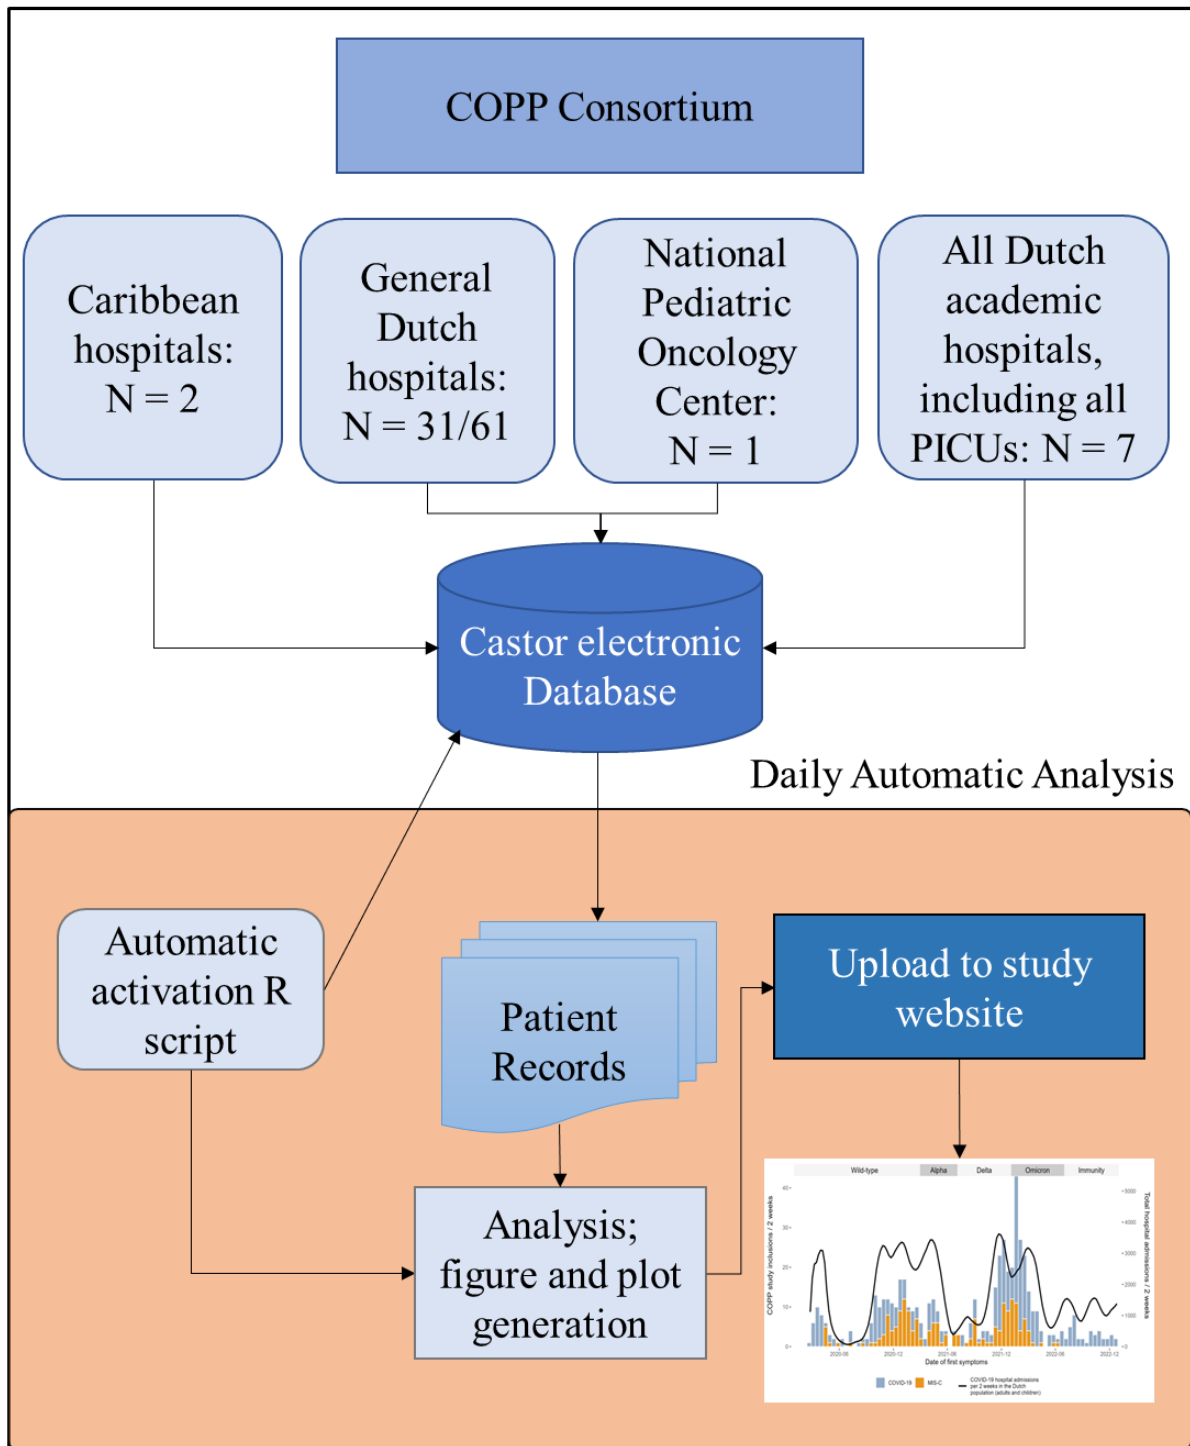

Supplement: inf-42-1077-s001.pdf [file inf-42-1077-s001.pdf]

Supplemental Digital Content 4. Figure: Study Inclusion Flowchart

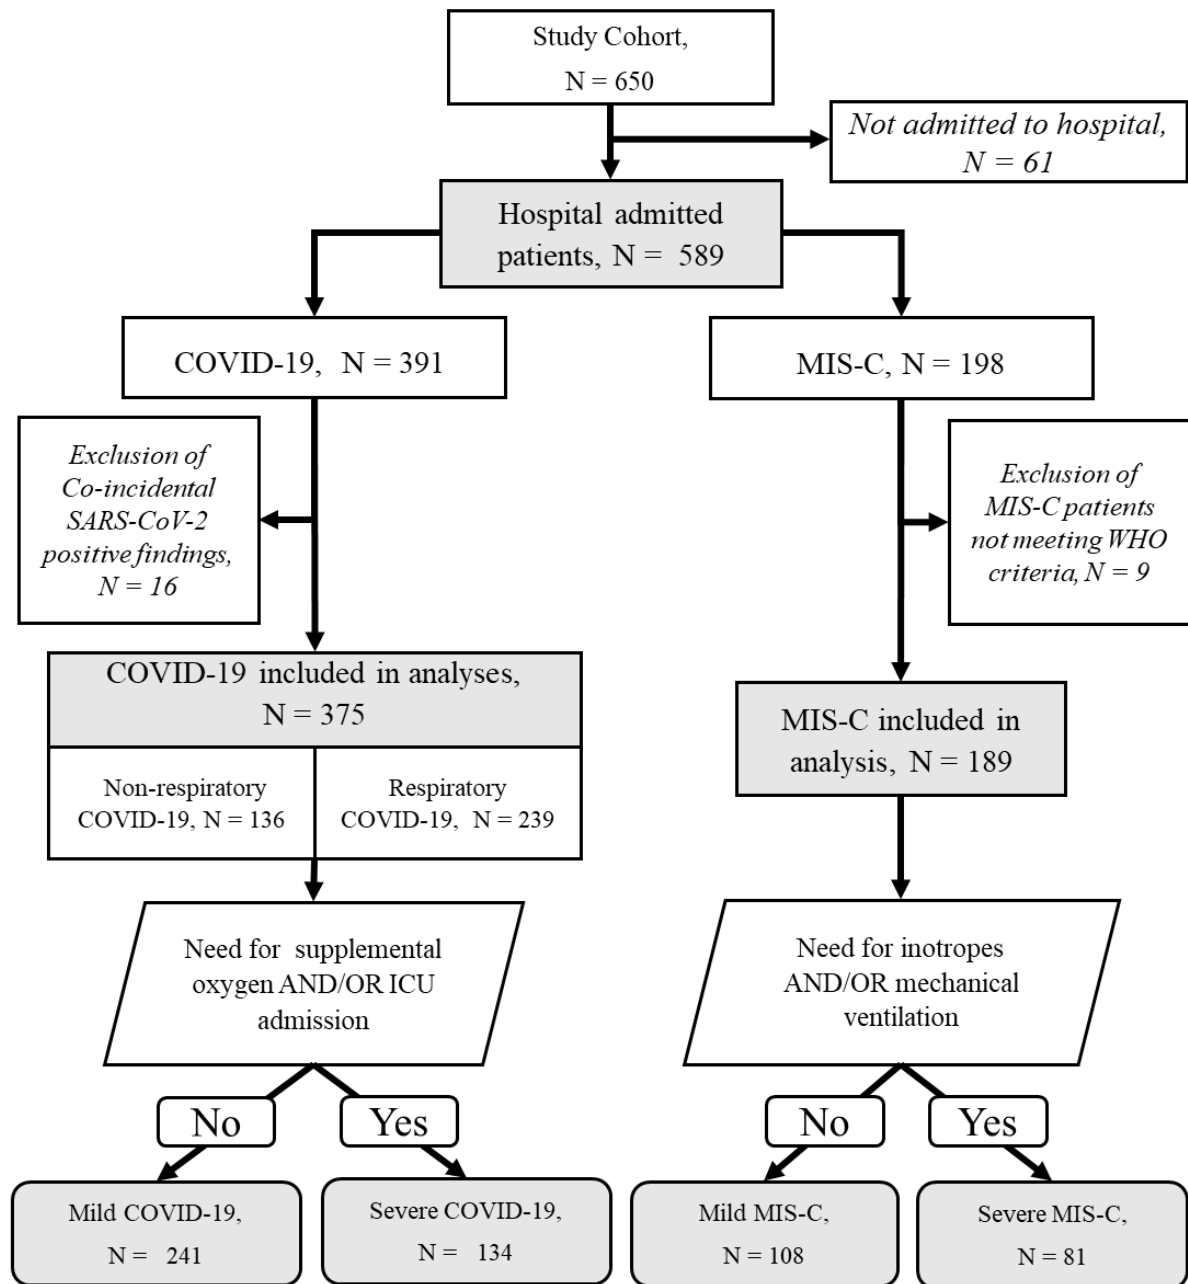

Supplement: inf-42-1077-s004.pdf [file inf-42-1077-s004.pdf]
